# Supplementary material for: Modest, not extreme, northern high latitude amplification during the Miocene shown by coccolith clumped isotopes
Source: Research Square preprint supplement (doi:10.21203/rs.3.rs-6393158/v1), 2025-04-08
Supplement: Supplementary file 1 [file 9d58e78b5f86948c495d253e.xlsx]

## Sheet: Sample details
Leg/Exp	Site	Hole	Core	Type	Section	Interval (cm)
						Top	Bottom	Sample code
162	982	B	5	H	4	139	143	982 2
162	982	B	12	H	2	110	114	982 3
162	982	B	19	H	1	10	13	982 4
162	982	B	23	H	1	10	13	982 5
162	982	B	27	X	4	15	19	982 6
162	982	B	35	X	1	15	19	982 7
162	982	B	44	X	1	9	13	982 8
162	982	B	51	X	5	5	9	982 9
162	982	B	56	X	5	5	9	982 10

## Sheet: Complete Clumped dataset
Sample	Date/Time of run	Mass Spec	Acid Temp	Run	δ45 WG (PBL)	δ46 WG (PBL)	δ47 WG (PBL)	δ48 WG (PBL)	δ49 WG (PBL)	∆47 CDES (ETF)	∆47 CDES (Final)	Average ∆47 CDES (ETF)	Average ∆47 CDES (Final)	∆47 CDES (Final) SD	∆47 CDES (Final) SE	∆48 Offset	49 Param
ST Iceland	2019-11-21 11:27 CET	MAT253	70	2644	7.231	9.467	16.671	19.196	34.482	0.705	0.705	0.659095	0.659095	0.032496	0.00709121	0.053	0.06
	2019-11-21 12:16 CET	MAT253	70	2644	7.237	9.493	16.697	19.23	22.561	0.698	0.698					0.034	0.042
	2019-11-21 13:02 CET	MAT253	70	2644	7.253	9.443	16.582	19.203	32.001	0.607	0.607					0.106	0.056
	2019-11-25 09:35 CET	MAT253	70	2646	7.259	9.474	16.611	19.159	21.942	0.599	0.599					0.002	0.043
	2019-11-25 10:23 CET	MAT253	70	2646	7.246	9.526	16.655	19.098	9.514	0.605	0.605					-0.159	0.018
	2019-11-25 11:09 CET	MAT253	70	2646	7.239	9.491	16.674	19.413	25.74	0.672	0.672					0.216	0.054
	2019-11-29 18:08 CET	MAT253	70	2649	7.264	9.447	16.619	19.117	80.034	0.631	0.631					0.015	0.137
	2019-11-29 19:01 CET	MAT253	70	2649	7.246	9.46	16.647	19.172	85.037	0.668	0.668					0.043	0.14
	2019-11-29 19:49 CET	MAT253	70	2649	7.222	9.436	16.64	19.357	89.701	0.715	0.715					0.27	0.147
	2019-12-05 00:30 CET	MAT253	70	2651	7.237	9.443	16.599	19.338	92.683	0.644	0.644					0.237	0.153
	2019-12-05 01:29 CET	MAT253	70	2651	7.225	9.441	16.614	19.303	106.848	0.677	0.677					0.209	0.168
	2019-12-05 02:17 CET	MAT253	70	2651	7.229	9.434	16.612	19.234	100.994	0.678	0.678					0.155	0.163
	2019-12-09 16:25 CET	MAT253	70	2654	7.243	9.449	16.646	19.134	67.297	0.682	0.682					0.027	0.116
	2019-12-09 17:17 CET	MAT253	70	2654	7.241	9.482	16.674	19.231	62.886	0.681	0.681					0.057	0.104
	2019-12-09 18:05 CET	MAT253	70	2654	7.243	9.471	16.663	19.329	80.74	0.677	0.677					0.174	0.131
	2019-12-16 14:50 CET	MAT253	70	2658	7.238	9.463	16.604	19.159	26.736	0.628	0.628					0.025	0.046
	2019-12-16 15:45 CET	MAT253	70	2658	7.226	9.472	16.628	19.135	25.483	0.656	0.656					-0.018	0.043
	2019-12-16 16:32 CET	MAT253	70	2658	7.222	9.434	16.615	18.864	20.959	0.688	0.688					-0.206	0.038
	2019-12-19 22:26 CET	MAT253	70	2660	7.23	9.452	16.613	19.029	37.697	0.658	0.658					-0.081	0.062
	2019-12-19 23:19 CET	MAT253	70	2660	7.256	9.501	16.672	19.757	56.978	0.64	0.64					0.53	0.093
	2019-12-20 00:07 CET	MAT253	70	2660	7.235	9.457	16.599	19.198	45.328	0.632	0.632					0.074	0.075
982 2 2-10	2019-04-12 18:02 CEST	MAT253	70	2518	7.891	9.691	17.479	19.494	-13.661	0.677	0.677	0.652059	0.652059	0.0259671	0.00553621	0.083	0.077
	2019-05-11 01:50 CEST	MAT253	70	2534	7.799	9.681	17.33	19.504	36.194	0.623	0.623					0.113	0.048
	2019-05-11 02:46 CEST	MAT253	70	2534	7.803	9.687	17.368	19.637	39.39	0.655	0.655					0.231	0.052
	2019-05-16 00:17 CEST	MAT253	70	2537	7.864	9.728	17.466	19.581	8.912	0.668	0.668					0.054	0.014
	2019-05-16 01:04 CEST	MAT253	70	2537	7.882	9.675	17.439	19.311	19.477	0.676	0.676					-0.104	0.031
	2019-05-16 01:52 CEST	MAT253	70	2537	7.915	9.71	17.477	19.451	11.764	0.639	0.639					-0.037	0.018
	2019-05-23 10:02 CEST	MAT253	70	2542	7.809	9.696	17.338	19.438	17.887	0.618	0.618					0.004	0.035
	2019-05-23 10:51 CEST	MAT253	70	2542	7.903	9.724	17.52	19.348	8.539	0.681	0.681					-0.14	0.016
	2019-11-09 01:57 CET	MAT253	70	2636	7.847	9.654	17.427	19.244	55.582	0.626	0.626					-0.272	0.08
	2019-11-22 09:49 CET	MAT253	70	2644	7.815	9.625	17.4	19.439	74.625	0.666	0.666					-0.024	0.131
	2019-11-22 10:37 CET	MAT253	70	2644	7.877	9.629	17.427	19.341	57.156	0.618	0.618					-0.128	0.103
	2019-11-22 11:32 CET	MAT253	70	2644	7.848	9.632	17.445	19.429	59.504	0.668	0.668					-0.048	0.109
	2019-11-25 16:56 CET	MAT253	70	2646	7.847	9.643	17.398	19.333	43.494	0.606	0.606					-0.164	0.086
	2019-11-25 17:44 CET	MAT253	70	2646	7.879	9.642	17.485	19.613	42.712	0.666	0.666					0.11	0.087
	2019-11-25 18:40 CET	MAT253	70	2646	7.901	9.663	17.508	19.466	46.418	0.643	0.643					-0.075	0.09
	2019-11-30 03:33 CET	MAT253	70	2649	7.82	9.648	17.419	19.445	68.453	0.655	0.655					-0.064	0.114
	2019-11-30 04:22 CET	MAT253	70	2649	7.819	9.599	17.41	19.431	58.681	0.7	0.7					0.018	0.099
982 3 2-10	2019-05-11 03:34 CEST	MAT253	70	2534	7.37	8.611	15.824	17.028	8.302	0.624	0.624	0.632222	0.632222	0.0125236	0.00361524	-0.191	0.011
	2019-05-11 04:22 CEST	MAT253	70	2534	7.407	8.651	15.899	17.188	13.762	0.62	0.62					-0.114	0.018
	2019-05-11 05:09 CEST	MAT253	70	2534	7.483	8.657	15.984	17.312	0.907	0.62	0.62					-0.004	0.001
	2019-05-16 03:35 CEST	MAT253	70	2537	7.439	8.661	15.942	17.163	3.57	0.64	0.64					-0.191	0.005
	2019-05-16 04:23 CEST	MAT253	70	2537	7.427	8.643	15.914	17.469	14.329	0.643	0.643					0.145	0.022
	2019-05-23 18:19 CEST	MAT253	70	2542	7.407	8.678	15.929	17.344	29.857	0.637	0.637					-0.029	0.06
	2019-05-23 19:16 CEST	MAT253	70	2542	7.411	8.64	15.877	17.656	42.415	0.617	0.617					0.353	0.08
	2019-06-04 06:15 CEST	MAT253	70	2550	7.454	8.668	15.963	17.473	14.576	0.632	0.632					0.118	0.03
	2019-06-04 07:02 CEST	MAT253	70	2550	7.425	8.646	15.934	17.338	4.787	0.657	0.657					0.029	0.01
982 4 2-10	2019-02-28 18:15 CET	MAT253	70	2500	7.808	8.734	16.401	17.283	29.867	0.606	0.606	0.653938	0.653938	0.0276031	0.00650612	-0.2	0.029
	2019-02-28 19:09 CET	MAT253	70	2500	7.787	8.802	16.501	17.672	41.136	0.668	0.668					0.046	0.042
	2019-02-28 19:56 CET	MAT253	70	2500	7.823	8.731	16.451	17.175	34.502	0.649	0.649					-0.302	0.036
	2019-03-01 23:30 CET	MAT253	70	2501	7.81	8.776	16.464	17.553	22.99	0.629	0.629					-0.018	0.033
	2019-03-02 00:17 CET	MAT253	70	2501	7.801	8.749	16.476	17.673	19.128	0.684	0.684					0.152	0.026
	2019-03-02 01:03 CET	MAT253	70	2501	7.804	8.751	16.473	17.624	18.68	0.674	0.674					0.1	0.026
	2019-03-12 08:42 CET	MAT253	70	2505	7.799	8.738	16.424	17.348	48.308	0.652	0.652					-0.173	0.081
	2019-03-12 09:29 CET	MAT253	70	2505	7.811	8.74	16.421	17.409	43.506	0.631	0.631					-0.119	0.078
	2019-03-12 10:15 CET	MAT253	70	2505	7.806	8.785	16.515	17.569	48.826	0.693	0.693					-0.051	0.089
	2019-03-14 06:33 CET	MAT253	70	2506	7.746	8.6	16.218	17.189	64.314	0.634	0.634					-0.057	0.101
	2019-03-14 07:21 CET	MAT253	70	2506	7.811	8.741	16.475	17.694	61.036	0.692	0.692					0.159	0.096
	2019-03-14 08:08 CET	MAT253	70	2506	7.807	8.766	16.442	17.449	58.59	0.631	0.631					-0.13	0.103
	2019-04-26 16:49 CEST	MAT253	70	2525	7.794	8.735	16.41	17.676	-19.73	0.659	0.659					0.198	0.112
	2019-05-14 18:09 CEST	MAT253	70	2535	7.797	8.793	16.459	17.746	19.434	0.656	0.656					0.118	0.034
	2019-05-14 18:56 CEST	MAT253	70	2535	7.852	8.909	16.663	17.771	8.396	0.693	0.693					-0.088	0.014
	2019-05-14 19:44 CEST	MAT253	70	2535	7.797	8.793	16.42	17.357	0.292	0.612	0.612					-0.262	0
982 5 2-10	2019-05-11 05:56 CEST	MAT253	70	2534	7.783	8.774	16.436	17.536	19.93	0.648	0.648	0.642	0.642	0.0169615	0.00411377	-0.016	0.026
	2019-05-11 06:44 CEST	MAT253	70	2534	7.736	8.688	16.284	17.282	7.422	0.626	0.626					-0.095	0.01
	2019-05-11 07:41 CEST	MAT253	70	2534	7.725	8.691	16.275	17.299	-8.843	0.627	0.627					-0.084	-0.013
	2019-05-16 05:10 CEST	MAT253	70	2537	7.726	8.749	16.325	17.576	-3.047	0.636	0.636					0.037	-0.005
	2019-05-16 05:58 CEST	MAT253	70	2537	7.751	8.723	16.339	17.379	5.263	0.652	0.652					-0.102	0.008
	2019-05-23 20:05 CEST	MAT253	70	2542	7.763	8.746	16.369	17.623	25.9	0.64	0.64					0.11	0.048
	2019-05-23 21:41 CEST	MAT253	70	2542	7.753	8.72	16.356	17.374	32.719	0.665	0.665					-0.083	0.059
	2019-06-03 18:35 CEST	MAT253	70	2550	7.745	8.733	16.342	17.667	26.089	0.643	0.643					0.178	0.062
	2019-08-08 12:45 CEST	MAT253	70	2585	7.737	8.72	16.432	17.66	-18.07	0.657	0.657					0.171	0.099
	2019-08-08 13:37 CEST	MAT253	70	2585	7.703	8.687	16.32	17.219	-10.716	0.608	0.608					-0.194	0.056
	2019-08-08 14:27 CEST	MAT253	70	2585	7.701	8.672	16.358	17.692	-27.765	0.67	0.67					0.299	0.147
	2019-08-13 00:49 CEST	MAT253	70	2587	7.757	8.671	16.375	17.644	53.304	0.624	0.624					0.252	0.12
	2019-08-13 01:37 CEST	MAT253	70	2587	7.693	8.679	16.34	17.411	52.379	0.65	0.65					0.008	0.118
982 6 2-10	2019-04-12 20:31 CEST	MAT253	70	2518	7.56	8.353	15.767	16.703	-4.247	0.629	0.629	0.622722	0.622722	0.0242162	0.00570781	0.003	0.025
	2019-05-11 08:28 CEST	MAT253	70	2534	7.564	8.417	15.816	16.609	-4.483	0.603	0.603					-0.218	-0.007
	2019-05-11 09:16 CEST	MAT253	70	2534	7.599	8.484	15.903	16.885	8.753	0.586	0.586					-0.079	0.012
	2019-05-11 10:04 CEST	MAT253	70	2534	7.566	8.44	15.852	16.776	16.572	0.616	0.616					-0.1	0.023
	2019-05-16 07:41 CEST	MAT253	70	2537	7.585	8.439	15.819	16.548	-11.51	0.576	0.576					-0.352	-0.019
	2019-05-16 08:28 CEST	MAT253	70	2537	7.603	8.507	15.968	16.921	22.119	0.648	0.648					-0.122	0.038
	2019-05-16 09:16 CEST	MAT253	70	2537	7.588	8.429	15.878	16.903	16.96	0.652	0.652					0.016	0.028
	2019-05-23 22:29 CEST	MAT253	70	2542	7.583	8.483	15.896	16.927	38.667	0.613	0.613					-0.049	0.068
	2019-05-23 23:17 CEST	MAT253	70	2542	7.576	8.474	15.925	16.948	38.989	0.662	0.662					-0.011	0.069
	2019-05-24 00:14 CEST	MAT253	70	2542	7.586	8.439	15.882	16.922	44.06	0.642	0.642					0.032	0.077
	2019-06-05 17:31 CEST	MAT253	70	2551	7.584	8.448	15.858	16.743	-9.389	0.607	0.607					-0.16	-0.019
	2019-06-05 18:19 CEST	MAT253	70	2551	7.582	8.458	15.873	16.883	18.562	0.615	0.615					-0.044	0.037
	2019-11-09 04:28 CET	MAT253	70	2636	7.578	8.394	15.877	16.909	48.517	0.602	0.602					-0.046	0.072
	2019-11-09 05:20 CET	MAT253	70	2636	7.582	8.435	15.922	16.909	48.447	0.602	0.602					-0.128	0.072
	2019-11-09 06:07 CET	MAT253	70	2636	7.575	8.4	15.907	16.887	50.9	0.632	0.632					-0.079	0.075
	2019-11-18 19:31 CET	MAT253	70	2642	7.581	8.386	15.912	16.868	54.08	0.646	0.646					-0.071	0.1
	2019-11-18 20:23 CET	MAT253	70	2642	7.573	8.441	15.935	16.996	69.761	0.62	0.62					-0.055	0.125
	2019-11-18 21:10 CET	MAT253	70	2642	7.569	8.373	15.898	17.173	51.427	0.658	0.658					0.253	0.09
982 7 2-10	2019-02-22 21:54 CET	MAT253	70	2498	8.053	8.254	16.197	16.292	14.352	0.625	0.625	0.6262	0.6262	0.0281613	0.00600401	-0.221	0.022
	2019-02-28 08:32 CET	MAT253	70	2500	8.009	8.204	16.105	16.36	24.435	0.629	0.629					-0.054	0.015
	2019-02-28 09:26 CET	MAT253	70	2500	7.956	8.255	16.119	16.274	24.829	0.65	0.65					-0.24	0.017
	2019-03-02 09:51 CET	MAT253	70	2501	8.054	8.249	16.165	16.459	38.299	0.592	0.592					-0.047	0.058
	2019-03-02 10:38 CET	MAT253	70	2501	8.056	8.215	16.163	16.518	33.768	0.627	0.627					0.079	0.052
	2019-03-02 11:25 CET	MAT253	70	2501	8.057	8.261	16.215	16.338	27.731	0.633	0.633					-0.19	0.044
	2019-03-12 13:32 CET	MAT253	70	2505	8.053	8.249	16.201	16.828	58.78	0.648	0.648					0.287	0.101
	2019-03-12 14:19 CET	MAT253	70	2505	8.063	8.234	16.15	16.573	63.341	0.596	0.596					0.068	0.106
	2019-03-12 15:07 CET	MAT253	70	2505	8.066	8.254	16.199	16.562	54.282	0.626	0.626					0.017	0.092
	2019-03-14 11:25 CET	MAT253	70	2506	8.026	8.186	16.057	16.405	62.032	0.589	0.589					-0.001	0.11
	2019-03-14 12:59 CET	MAT253	70	2506	8.067	8.271	16.181	16.844	63.393	0.584	0.584					0.258	0.113
	2019-05-14 20:31 CEST	MAT253	70	2535	8.082	8.306	16.23	16.638	-8.4	0.606	0.606					0.002	-0.015
	2019-05-14 21:18 CEST	MAT253	70	2535	8.055	8.287	16.221	16.604	15.754	0.649	0.649					0.004	0.026
	2019-05-14 22:04 CEST	MAT253	70	2535	8.017	8.233	16.168	16.723	-6.539	0.696	0.696					0.228	-0.012
	2019-11-09 06:57 CET	MAT253	70	2636	8.051	8.263	16.262	16.766	52.234	0.628	0.628					0.075	0.078
	2019-11-09 07:45 CET	MAT253	70	2636	8.049	8.232	16.217	16.546	46.249	0.614	0.614					-0.078	0.069
	2019-11-09 08:40 CET	MAT253	70	2636	8.041	8.231	16.255	16.543	53.515	0.666	0.666					-0.079	0.082
	2019-11-18 22:02 CET	MAT253	70	2642	8.047	8.245	16.209	16.605	46.166	0.592	0.592					-0.047	0.077
	2019-11-18 22:50 CET	MAT253	70	2642	8.042	8.211	16.226	16.708	61.265	0.654	0.654					0.121	0.099
	2019-11-18 23:45 CET	MAT253	70	2642	8.045	8.248	16.233	16.865	79.423	0.62	0.62					0.202	0.128
982 8 2-10	2019-05-11 15:00 CEST	MAT253	70	2534	8.617	8.689	17.193	17.191	4.926	0.615	0.615	0.629895	0.629895	0.0299682	0.00638925	-0.187	0.007
	2019-05-11 15:48 CEST	MAT253	70	2534	8.63	8.732	17.239	17.172	-14.356	0.605	0.605					-0.29	-0.023
	2019-05-16 13:20 CEST	MAT253	70	2537	8.636	8.7	17.18	17.212	14.599	0.585	0.585					-0.221	0.024
	2019-05-16 14:07 CEST	MAT253	70	2537	8.619	8.644	17.13	17.259	17.215	0.612	0.612					-0.063	0.029
	2019-05-16 14:54 CEST	MAT253	70	2537	8.651	8.77	17.273	17.646	26.482	0.594	0.594					0.066	0.046
	2019-08-09 00:56 CEST	MAT253	70	2585	8.574	8.613	17.228	17.228	-17.894	0.692	0.692					-0.04	0.099
	2019-08-09 01:44 CEST	MAT253	70	2585	8.605	8.635	17.227	17.402	-18.834	0.631	0.631					0.088	0.105
	2019-08-09 02:31 CEST	MAT253	70	2585	8.607	8.616	17.2	17.23	-18.164	0.618	0.618					-0.044	0.102
	2019-08-13 11:18 CEST	MAT253	70	2587	8.657	8.669	17.322	17.443	48.514	0.638	0.638					0.06	0.112
	2019-08-13 12:05 CEST	MAT253	70	2587	8.608	8.62	17.22	17.248	66.594	0.635	0.635					-0.033	0.16
	2019-08-13 12:53 CEST	MAT253	70	2587	8.643	8.648	17.279	17.486	50.833	0.629	0.629					0.144	0.117
	2019-08-14 18:56 CEST	MAT253	70	2588	8.713	8.822	17.508	17.532	-30.071	0.611	0.611					-0.157	-0.063
	2019-08-14 19:44 CEST	MAT253	70	2588	8.708	8.718	17.467	17.564	-12.532	0.687	0.687					0.081	-0.027
	2019-08-14 20:34 CEST	MAT253	70	2588	8.702	8.744	17.461	17.691	0.13	0.658	0.658					0.154	0
	2019-11-09 09:28 CET	MAT253	70	2636	8.601	8.626	17.233	17.074	54.034	0.669	0.669					-0.345	0.083
	2019-11-09 10:18 CET	MAT253	70	2636	8.572	8.59	17.123	17.117	52.38	0.62	0.62					-0.233	0.084
	2019-11-09 11:05 CET	MAT253	70	2636	8.605	8.612	17.145	17.292	44.174	0.585	0.585					-0.106	0.073
	2019-11-19 00:32 CET	MAT253	70	2642	8.619	8.604	17.196	17.786	56.701	0.633	0.633					0.392	0.089
	2019-11-19 01:24 CET	MAT253	70	2642	8.603	8.649	17.24	17.583	54.174	0.651	0.651					0.105	0.083
982 9 2-10	2019-04-13 02:57 CEST	MAT253	70	2518	9.391	8.014	17.312	16.026	-3.301	0.602	0.602	0.623417	0.623417	0.0235707	0.00653733	0.009	0.02
	2019-05-11 16:36 CEST	MAT253	70	2534	9.369	8.043	17.37	16.126	15.699	0.656	0.656					0.052	0.025
	2019-05-11 17:34 CEST	MAT253	70	2534	9.378	8.08	17.402	16.074	22.777	0.64	0.64					-0.073	0.036
	2019-05-11 18:22 CEST	MAT253	70	2534	9.376	8.035	17.344	16.125	36.777	0.626	0.626					0.065	0.057
	2019-05-16 15:41 CEST	MAT253	70	2537	9.385	8.036	17.338	16.464	36.829	0.627	0.627					0.365	0.062
	2019-05-16 17:24 CEST	MAT253	70	2537	9.368	8.016	17.324	16.067	29.366	0.656	0.656					0.017	0.048
	2019-11-09 15:16 CET	MAT253	70	2636	9.393	8.005	17.373	15.77	52.888	0.595	0.595					-0.385	0.093
	2019-11-09 16:04 CET	MAT253	70	2636	9.379	7.976	17.314	15.918	46.105	0.578	0.578					-0.182	0.081
	2019-11-09 16:53 CET	MAT253	70	2636	9.357	8.007	17.375	16.301	59.393	0.636	0.636					0.129	0.104
	2019-11-19 06:20 CET	MAT253	70	2642	9.369	8.012	17.37	16.089	63.665	0.612	0.612					-0.087	0.095
	2019-11-19 07:07 CET	MAT253	70	2642	9.347	7.941	17.306	16.001	68.416	0.644	0.644					-0.033	0.104
	2019-11-19 08:00 CET	MAT253	70	2642	9.368	8.019	17.374	16.031	56.86	0.609	0.609					-0.159	0.092
982 10 2-10	2019-02-22 23:06 CET	MAT253	70	2498	8.084	7.178	15.178	14.468	27.39	0.642	0.642	0.628375	0.628375	0.0229289	0.00540439	0.121	0.041
	2019-02-28 10:14 CET	MAT253	70	2500	8.077	7.184	15.146	14.304	42.469	0.606	0.606					-0.052	0.031
	2019-02-28 11:01 CET	MAT253	70	2500	8.066	7.199	15.199	15.022	49.813	0.663	0.663					0.625	0.035
	2019-02-28 11:47 CET	MAT253	70	2500	8.078	7.149	15.15	14.377	73.627	0.651	0.651					0.09	0.057
	2019-03-02 04:17 CET	MAT253	70	2501	8.087	7.158	15.146	14.372	2.995	0.626	0.626					0.068	0.004
	2019-03-02 05:04 CET	MAT253	70	2501	8.073	7.199	15.169	14.267	31.382	0.621	0.621					-0.118	0.046
	2019-03-02 05:51 CET	MAT253	70	2501	8.081	7.142	15.112	14.526	34.005	0.61	0.61					0.25	0.049
	2019-03-12 15:54 CET	MAT253	70	2505	8.066	7.134	15.096	14.718	76.011	0.632	0.632					0.433	0.131
	2019-03-12 17:36 CET	MAT253	70	2505	8.075	7.167	15.135	14.545	75.737	0.63	0.63					0.197	0.128
	2019-03-14 14:41 CET	MAT253	70	2506	8.091	7.229	15.173	14.596	55.95	0.584	0.584					0.124	0.102
	2019-11-09 17:40 CET	MAT253	70	2636	8.082	7.138	15.139	14.821	60.507	0.583	0.583					0.41	0.104
	2019-11-09 18:39 CET	MAT253	70	2636	8.05	7.163	15.184	14.672	65.296	0.643	0.643					0.216	0.11
	2019-11-09 19:26 CET	MAT253	70	2636	8.062	7.146	15.19	14.93	66.889	0.654	0.654					0.502	0.111
	2019-11-19 08:47 CET	MAT253	70	2642	8.056	7.146	15.183	14.369	62.104	0.652	0.652					-0.047	0.109
	2019-11-19 09:44 CET	MAT253	70	2642	8.062	7.195	15.224	14.578	50.081	0.637	0.637					0.059	0.096
	2019-11-19 10:31 CET	MAT253	70	2642	8.072	7.178	15.202	14.347	54.1	0.62	0.62					-0.132	0.105
982 2 < 11	2018-11-24 08:49 CET	253 Plus	70	301	8.716	10.071	18.761	21.127	11.657	0.626	0.626	0.651364	0.651364	0.0195182	0.00503957	-0.981	0.343
	2018-11-24 10:24 CET	253 Plus	70	301	8.645	10.061	18.673	20.548	18.721	0.623	0.623					-1.511	0.575
	2018-11-24 11:19 CET	253 Plus	70	301	8.693	10.09	18.767	20.51	10.166	0.638	0.638					-1.603	0.308
	2018-11-27 12:09 CET	253 Plus	70	302	8.711	10.047	18.77	19.52	15.197	0.666	0.666					-1.181	0.432
	2018-11-27 12:58 CET	253 Plus	70	302	8.566	10.035	18.591	19.504	14.791	0.65	0.65					-1.174	0.421
	2018-11-27 13:47 CET	253 Plus	70	302	8.74	10.149	18.86	19.571	22.113	0.626	0.626					-1.333	0.646
	2018-11-27 14:35 CET	253 Plus	70	302	8.665	10.091	18.753	19.51	21.112	0.654	0.654					-1.278	0.62
	2018-12-04 09:44 CET	253 Plus	70	305	8.834	10.275	19.13	21.866	39.421	0.675	0.675					-0.822	1.306
	2018-12-04 10:32 CET	253 Plus	70	305	8.733	10.112	18.849	20.898	33.511	0.66	0.66					-1.403	1.089
	2018-12-04 11:20 CET	253 Plus	70	305	8.683	10.103	18.807	20.818	38.623	0.68	0.68					-1.46	1.244
	2018-12-04 12:08 CET	253 Plus	70	305	8.743	10.155	18.91	20.474	33.937	0.667	0.667					-1.885	1.099
982 3 < 11	2018-07-26 02:38 CEST	253 Plus	70	242	7.993	9.1	17.071	18.598	-114.351	0.646	0.646	0.639364	0.639364	0.00846676	0.00189322	-7.055	0.711
	2018-07-26 04:12 CEST	253 Plus	70	242	7.596	8.925	16.468	18.152	-131.023	0.628	0.628					-7.056	0.59
	2018-07-28 03:06 CEST	253 Plus	70	244	7.852	9.02	16.828	18.237	-137.158	0.627	0.627					-7.177	1.145
	2018-07-28 03:53 CEST	253 Plus	70	244	7.77	8.977	16.72	18.101	-107.931	0.647	0.647					-7.199	0.838
	2018-07-28 04:41 CEST	253 Plus	70	244	7.719	8.922	16.608	18.01	-95.516	0.643	0.643					-7.159	0.78
	2018-08-04 03:05 CEST	253 Plus	70	248	7.877	9.145	16.995	18.588	26.301	0.643	0.643					-7.152	0.679
	2018-08-04 03:55 CEST	253 Plus	70	248	7.974	9.178	17.133	18.526	-180.641	0.648	0.648					-7.265	0.589
	2019-02-12 17:35 CET	MAT253	70	2493	7.927	9.164	16.983	18.751	40.794	0.623	0.623					0.402	0.066
	2019-02-12 18:22 CET	MAT253	70	2493	7.528	8.679	16.106	17.332	39.095	0.644	0.644					-0.027	0.063
	2019-02-13 17:32 CET	MAT253	70	2494	8.134	9.383	17.432	18.824	23.048	0.642	0.642					0.039	0.034
	2019-02-13 18:19 CET	MAT253	70	2494	7.843	8.922	16.672	18.077	36.979	0.642	0.642					0.223	0.056
982 4 < 11	2018-11-27 01:21 CET	253 Plus	70	302	8.052	9.044	17.065	17.201	5.172	0.641	0.641	0.643481	0.643481	0.0320973	0.00717718	-2.546	0.161
	2018-11-27 02:10 CET	253 Plus	70	302	7.947	9.017	16.909	17.203	4.488	0.621	0.621					-2.492	0.134
	2018-11-27 02:59 CET	253 Plus	70	302	7.922	9.011	16.895	17.254	4.4	0.639	0.639					-2.429	0.139
	2018-11-27 03:48 CET	253 Plus	70	302	7.99	9.042	17	17.313	9.433	0.643	0.643					-2.434	0.309
	2018-12-13 14:57 CET	253 Plus	70	310	7.933	8.961	16.886	17.132	18.598	0.614	0.614					0.121	0.503
	2018-12-13 15:51 CET	253 Plus	70	310	7.941	8.985	16.883	17.046	12.394	0.582	0.582					-0.011	0.307
	2018-12-13 16:41 CET	253 Plus	70	310	7.915	8.961	16.856	17.105	26.593	0.603	0.603					0.095	0.752
	2019-01-31 18:43 CET	MAT253	70	2488	7.96	8.883	16.782	18.048	56.034	0.683	0.683					0.308	0.084
	2019-01-31 19:29 CET	MAT253	70	2488	7.893	8.825	16.649	17.833	58.484	0.677	0.677					0.214	0.087
	2019-02-11 20:40 CET	MAT253	70	2493	7.896	8.895	16.762	18.014	53.055	0.71	0.71					0.213	0.079
	2019-02-11 21:27 CET	MAT253	70	2493	7.876	8.827	16.632	17.725	33.541	0.664	0.664					0.066	0.051
	2019-02-13 19:59 CET	MAT253	70	2494	7.833	8.789	16.52	17.931	25.809	0.643625	0.643625					0.342	0.036
	2019-02-13 20:46 CET	MAT253	70	2494	7.931	8.851	16.717	17.822	26.505	0.668	0.668					0.113	0.036
	2019-02-13 21:33 CET	MAT253	70	2494	7.933	8.876	16.726	17.7	22.93	0.649	0.649					-0.056	0.032
	2019-04-12 22:06 CEST	MAT253	70	2518	7.995	8.926	16.799	17.812	0.908	0.644	0.644					-0.047	-0.005
	2019-04-12 22:53 CEST	MAT253	70	2518	7.874	8.885	16.609	17.895	-1.404	0.616	0.616					0.116	0.008
	2019-04-12 23:41 CEST	MAT253	70	2518	7.888	8.854	16.621	17.766	-3.313	0.647	0.647					0.05	0.02
	2019-05-11 19:10 CEST	MAT253	70	2534	7.93	8.949	16.739	17.963	8.37	0.62	0.62					0.055	0.013
	2019-05-11 19:57 CEST	MAT253	70	2534	7.907	8.892	16.729	18.106	17.755	0.698	0.698					0.307	0.026
	2019-05-11 20:45 CEST	MAT253	70	2534	7.936	8.957	16.741	17.802	21.962	0.607	0.607					-0.118	0.032
982 5 < 11	2018-07-26 05:00 CEST	253 Plus	70	242	8.186	9.078	17.251	18.558	-217.552	0.646	0.646	0.643692	0.643692	0.0247181	0.00567071	-7.042	0.66
	2018-07-26 05:46 CEST	253 Plus	70	242	8.338	9.134	17.439	18.486	-117.183	0.619	0.619					-7.21	0.629
	2018-07-26 06:43 CEST	253 Plus	70	242	8.386	9.175	17.527	18.542	-135.233	0.617	0.617					-7.248	0.782
	2018-07-28 05:29 CEST	253 Plus	70	244	8.143	9.04	17.171	18.421	-105.427	0.649	0.649					-7.073	0.849
	2018-07-28 06:24 CEST	253 Plus	70	244	8.433	9.289	17.695	18.85	-145.793	0.622	0.622					-7.234	1.394
	2018-08-04 06:22 CEST	253 Plus	70	248	8.218	9.071	17.259	18.345	-5294.14	0.623	0.623					-7.195	0.653
	2018-08-04 07:20 CEST	253 Plus	70	248	8.058	8.988	17.031	18.241	-1532.69	0.646	0.646					-7.112	0.415
	2019-01-31 20:23 CET	MAT253	70	2488	8.264	8.973	17.175	18.135	48.79	0.67	0.67					0.216	0.068
	2019-01-31 21:10 CET	MAT253	70	2488	8.339	9.045	17.326	18.003	64.509	0.671	0.671					-0.057	0.087
	2019-02-11 22:20 CET	MAT253	70	2493	8.47	9.045	17.458	18.394	50.002	0.653	0.653					0.288	0.075
	2019-02-11 23:07 CET	MAT253	70	2493	8.103	8.852	16.896	17.698	44.537	0.667	0.667					-0.01	0.066
	2019-05-10 04:27 CEST	MAT253	70	2533	8.21	9.02	17.157	18.136	21.443	0.685	0.685					0.083	0.033
	2019-05-10 05:15 CEST	MAT253	70	2533	8.076	9.008	16.929	17.736	0.759	0.6	0.6					-0.284	0.001
982 6 < 11	2018-07-25 12:00 CEST	253 Plus	70	242	7.655	8.55	16.143	17.604	-23.03	0.61	0.61	0.623687	0.623687	0.0259512	0.00595361	-6.739	0.201
	2018-07-26 07:33 CEST	253 Plus	70	242	7.632	8.433	15.993	17.177	-129.653	0.602	0.602					-6.839	0.814
	2018-07-26 08:20 CEST	253 Plus	70	242	7.628	8.433	16.004	17.015	-85.585	0.618	0.618					-6.965	0.597
	2018-07-26 09:07 CEST	253 Plus	70	242	7.61	8.41	15.995	16.928	-96.163	0.652	0.652					-6.988	0.572
	2018-07-28 12:11 CEST	253 Plus	70	244	7.594	8.363	15.908	16.907	-122.543	0.629	0.629					-6.91	0.95
	2018-07-28 13:00 CEST	253 Plus	70	244	7.625	8.433	16.01	17.285	-122.674	0.63	0.63					-6.755	0.923
	2018-07-28 13:48 CEST	253 Plus	70	244	7.641	8.491	16.086	17.116	-116.151	0.632	0.632					-7.001	0.86
	2019-01-31 21:56 CET	MAT253	70	2488	7.601	8.31	15.828	16.806	48.312	0.668	0.668					0.228	0.064
	2019-01-31 22:43 CET	MAT253	70	2488	7.599	8.375	15.865	16.797	43.074	0.641	0.641					0.09	0.056
	2019-02-11 23:54 CET	MAT253	70	2493	7.607	8.43	15.945	16.985	33.747	0.648	0.648					0.128	0.049
	2019-02-12 00:41 CET	MAT253	70	2493	7.596	8.357	15.857	16.892	33.531	0.644	0.644					0.182	0.048
	2019-02-13 22:19 CET	MAT253	70	2494	7.606	8.435	15.94	16.924	14.509	0.637	0.637					0.057	0.019
	2019-02-13 23:07 CET	MAT253	70	2494	7.596	8.351	15.806	16.681	19.176	0.593	0.593					-0.014	0.025
	2019-02-14 00:01 CET	MAT253	70	2494	7.606	8.456	15.921	16.816	2.561	0.593	0.593					-0.091	0.003
	2019-05-10 06:03 CEST	MAT253	70	2533	7.568	8.389	15.806	16.723	4.672	0.62	0.62					-0.05	0.007
	2019-05-10 06:49 CEST	MAT253	70	2533	7.62	8.455	15.872	16.921	14.353	0.562	0.562					0.013	0.022
982 7 < 11	2018-11-24 12:07 CET	253 Plus	70	301	8.162	8.46	16.546	17.104	11.778	0.587	0.587	0.6236	0.6236	0.0257922	0.00576732	-1.611	0.366
	2018-11-24 12:56 CET	253 Plus	70	301	8.175	8.481	16.595	16.913	8.477	0.602	0.602					-1.835	0.259
	2018-11-24 13:44 CET	253 Plus	70	301	8.159	8.438	16.517	16.658	9.284	0.583	0.583					-1.993	0.284
	2018-11-24 14:32 CET	253 Plus	70	301	8.151	8.46	16.545	16.917	9.638	0.598	0.598					-1.789	0.295
	2018-11-27 08:48 CET	253 Plus	70	302	8.142	8.427	16.58	16.549	15.116	0.673	0.673					-0.898	0.5
	2018-11-27 10:25 CET	253 Plus	70	302	8.162	8.495	16.654	16.469	11.334	0.66	0.66					-1.111	0.326
	2018-11-27 11:19 CET	253 Plus	70	302	8.163	8.472	16.606	16.318	9.794	0.634	0.634					-1.215	0.27
	2018-12-04 13:02 CET	253 Plus	70	305	8.169	8.46	16.611	17.095	34.6	0.647	0.647					-1.691	1.134
	2018-12-04 13:51 CET	253 Plus	70	305	8.171	8.497	16.621	17.082	37.747	0.617	0.617					-1.776	1.228
	2018-12-04 14:39 CET	253 Plus	70	305	8.172	8.484	16.633	17.2	39.875	0.643	0.643					-1.64	1.316
	2018-12-04 15:27 CET	253 Plus	70	305	8.162	8.49	16.639	16.938	40.836	0.652	0.652					-1.898	1.362
	2018-12-13 21:39 CET	253 Plus	70	310	8.155	8.475	16.602	16.243	32.599	0.583	0.583					0.191	0.976
	2018-12-13 22:29 CET	253 Plus	70	310	8.15	8.447	16.607	16.086	23.574	0.617	0.617					0.09	0.625
	2019-02-04 17:24 CET	MAT253	70	2489	8.111	8.304	16.308	16.629	20.12	0.619	0.619					0.066	0.035
	2019-02-04 18:11 CET	MAT253	70	2489	8.108	8.285	16.289	16.706	17.6	0.622	0.622					0.18	0.03
	2019-02-14 00:48 CET	MAT253	70	2494	8.129	8.415	16.469	16.647	26.078	0.644	0.644					-0.174	0.035
	2019-02-14 01:34 CET	MAT253	70	2494	8.105	8.303	16.32	16.517	14.155	0.629	0.629					-0.08	0.019
	2019-02-14 02:22 CET	MAT253	70	2494	8.106	8.368	16.398	16.671	18.167	0.643	0.643					-0.058	0.025
	2019-05-10 07:45 CEST	MAT253	70	2533	8.113	8.395	16.384	16.775	20.27	0.627	0.627					-0.01	0.031
	2019-05-10 08:33 CEST	MAT253	70	2533	8.106	8.339	16.289	16.534	15.678	0.592	0.592					-0.136	0.024
982 8 <11	2018-07-26 09:55 CEST	253 Plus	70	242	8.687	8.771	17.452	17.836	-97.642	0.63	0.63	0.640882	0.640882	0.0201783	0.00462921	-6.995	0.555
	2018-07-26 11:44 CEST	253 Plus	70	242	8.741	8.786	17.532	17.774	-105.15	0.638	0.638					-7.075	0.72
	2018-07-28 00:33 CEST	253 Plus	70	244	8.728	8.82	17.573	17.904	-114.641	0.661	0.661					-7.04	0.97
	2018-07-28 01:20 CEST	253 Plus	70	244	8.685	8.769	17.477	17.672	-108.008	0.66	0.66					-7.119	0.969
	2018-07-28 14:44 CEST	253 Plus	70	244	8.758	8.867	17.608	18.069	-166.211	0.618	0.618					-7.006	1.413
	2018-07-28 16:19 CEST	253 Plus	70	244	8.633	8.72	17.326	17.581	-173.034	0.612	0.612					-7.094	1.391
	2018-07-28 19:37 CEST	253 Plus	70	244	8.737	8.8	17.555	17.877	-117.524	0.655	0.655					-7.022	0.962
	2018-08-04 08:08 CEST	253 Plus	70	248	8.693	8.802	17.523	17.839	-569.253	0.662	0.662					-7.056	0.534
	2018-08-04 08:56 CEST	253 Plus	70	248	8.708	8.802	17.512	17.865	48254.8	0.635	0.635					-7.035	0.429
	2018-08-04 09:46 CEST	253 Plus	70	248	8.728	8.807	17.547	17.874	219.243	0.644	0.644					-7.038	0.605
	2019-01-31 23:30 CET	MAT253	70	2488	8.717	8.671	17.354	17.499	34.601	0.677	0.677					0.191	0.047
	2019-02-01 00:17 CET	MAT253	70	2488	8.634	8.64	17.203	17.102	37.476	0.638	0.638					-0.137	0.053
	2019-02-12 01:28 CET	MAT253	70	2493	8.688	8.679	17.292	17.302	20.546	0.621	0.621					-0.055	0.03
	2019-02-12 02:15 CET	MAT253	70	2493	8.642	8.499	17.075	16.899	31.073	0.63	0.63					-0.094	0.046
	2019-02-14 06:25 CET	MAT253	70	2494	8.581	8.602	17.089	16.977	31.656	0.604	0.604					-0.221	0.044
	2019-02-14 07:13 CET	MAT253	70	2494	8.627	8.636	17.228	17.363	21.471	0.669	0.669					0.09	0.03
	2019-02-14 08:01 CET	MAT253	70	2494	8.589	8.646	17.175	17.367	31.501	0.641	0.641					0.073	0.046
982 9 <11	2018-11-24 15:20 CET	253 Plus	70	301	9.356	8.058	17.425	15.809	7.436	0.621	0.621	0.630353	0.630353	0.0245954	0.00564257	-2.048	0.222
	2018-11-24 16:14 CET	253 Plus	70	301	9.408	8.116	17.509	15.953	10.674	0.595	0.595					-2.026	0.332
	2018-11-27 15:24 CET	253 Plus	70	302	9.418	8.121	17.547	15.712	24.585	0.62	0.62					-1.116	0.74
	2018-11-27 16:11 CET	253 Plus	70	302	9.48	8.165	17.655	15.711	18.587	0.619	0.619					-1.204	0.543
	2018-11-27 16:59 CET	253 Plus	70	302	9.376	8.12	17.508	15.526	15.327	0.625	0.625					-1.297	0.438
	2018-12-04 16:15 CET	253 Plus	70	305	9.377	8.133	17.559	16.145	35.653	0.663	0.663					-1.934	1.163
	2018-12-04 17:03 CET	253 Plus	70	305	9.433	8.135	17.619	16.194	44.832	0.662	0.662					-1.892	1.466
	2018-12-04 17:57 CET	253 Plus	70	305	9.434	8.163	17.6	16.018	40.521	0.613	0.613					-2.112	1.334
	2018-12-04 18:45 CET	253 Plus	70	305	9.446	8.159	17.619	16.14	45.653	0.624	0.624					-1.991	1.567
	2018-12-06 11:42 CET	253 Plus	70	306	9.373	7.961	17.396	15.157	73.099	0.668	0.668					-0.192	2.632
	2018-12-06 12:30 CET	253 Plus	70	306	9.423	8.158	17.627	16.013	70.35	0.649	0.649					0.277	2.512
	2018-12-13 18:18 CET	253 Plus	70	310	9.411	8.112	17.545	15.546	22.252	0.581	0.581					0.211	0.642
	2019-02-04 19:06 CET	MAT253	70	2489	9.371	7.999	17.34	15.981	15.109	0.647	0.647					0.037	0.025
	2019-02-04 19:53 CET	MAT253	70	2489	9.37	7.967	17.287	15.711	21.006	0.623	0.623					-0.165	0.034
	2019-05-14 13:16 CEST	MAT253	70	2535	9.375	8.051	17.318	16.623	-15.928	0.602	0.602					0.493	-0.032
	2019-05-14 14:04 CEST	MAT253	70	2535	9.344	8.029	17.307	15.886	-0.905	0.652	0.652					-0.185	-0.002
	2019-05-14 14:51 CEST	MAT253	70	2535	9.361	8.05	17.346	16.122	-0.43	0.652	0.652					0.003	-0.001
982 10 <11	2018-07-25 13:36 CEST	253 Plus	70	242	8.234	7.394	15.583	15.33	-41.399	0.593	0.593	0.625053	0.625053	0.029518	0.00660043	-6.219	0.45
	2018-07-26 21:09 CEST	253 Plus	70	243	8.447	7.513	15.902	15.211	-191.415	0.571	0.571					-6.547	1.193
	2018-07-26 21:56 CEST	253 Plus	70	243	8.405	7.5	15.851	15.357	-198.728	0.577	0.577					-6.408	1.114
	2018-07-26 22:44 CEST	253 Plus	70	243	8.288	7.396	15.688	14.953	-151.227	0.642	0.642					-6.517	0.778
	2018-07-27 22:09 CEST	253 Plus	70	244	8.378	7.467	15.849	15.28	-136.119	0.641	0.641					-6.403	1.134
	2018-07-27 22:57 CEST	253 Plus	70	244	8.398	7.479	15.879	15.361	-125.646	0.638	0.638					-6.363	0.973
	2018-07-27 23:44 CEST	253 Plus	70	244	8.42	7.528	15.916	15.502	-168.15	0.602	0.602					-6.35	1.496
	2018-07-28 17:06 CEST	253 Plus	70	244	8.333	7.392	15.713	15.134	-122.632	0.628	0.628					-6.367	0.892
	2018-08-04 10:34 CEST	253 Plus	70	248	8.309	7.384	15.66	14.872	439.376	0.601	0.601					-6.556	0.279
	2018-08-04 12:19 CEST	253 Plus	70	248	8.349	7.415	15.73	15.208	939.318	0.599	0.599					-6.356	0.55
	2019-04-13 00:36 CEST	MAT253	70	2518	8.269	7.33	15.485	14.625	-4.948	0.623	0.623					-0.007	0.029
	2019-04-13 01:23 CEST	MAT253	70	2518	8.136	7.196	15.23	14.277	-5.073	0.642	0.642					-0.084	0.03
	2019-04-13 02:10 CEST	MAT253	70	2518	8.283	7.273	15.447	14.565	-2.916	0.627	0.627					0.045	0.017
	2019-05-11 21:33 CEST	MAT253	70	2534	8.349	7.363	15.641	14.839	29.297	0.661	0.661					0.136	0.043
	2019-05-11 22:29 CEST	MAT253	70	2534	8.342	7.385	15.679	14.679	22.185	0.687	0.687					-0.065	0.032
	2019-05-11 23:17 CEST	MAT253	70	2534	8.279	7.359	15.524	14.435	16.113	0.618	0.618					-0.252	0.023
	2019-05-14 15:39 CEST	MAT253	70	2535	8.244	7.371	15.488	14.599	3.965	0.624	0.624					-0.14	0.008
	2019-05-14 16:26 CEST	MAT253	70	2535	8.358	7.361	15.599	15.079	16.485	0.629	0.629					0.351	0.034
	2019-05-14 17:12 CEST	MAT253	70	2535	8.277	7.391	15.585	15.07	17.906	0.673	0.673					0.281	0.033
982 2 5-8	2019-07-27 19:55 CEST	MAT253	70	2578	6.72	9.228	15.879	18.534	63.971	0.632	0.632	0.647333	0.647333	0.0213542	0.00711805	-0.006	0.12
	2019-07-30 01:05 CEST	MAT253	70	2579	6.726	9.191	15.825	18.414	-19.655	0.634	0.634					-0.024	0.107
	2019-07-30 02:40 CEST	MAT253	70	2579	6.728	9.2	15.848	18.331	-19.18	0.647	0.647					-0.123	0.104
	2019-08-01 09:45 CEST	MAT253	70	2581	6.723	9.225	15.871	18.465	-16.56	0.65	0.65					-0.042	0.091
	2019-08-01 10:33 CEST	MAT253	70	2581	6.731	9.192	15.836	18.34	-14.446	0.639	0.639					-0.099	0.079
	2019-08-01 11:19 CEST	MAT253	70	2581	6.733	9.211	15.862	18.575	-17.31	0.645	0.645					0.093	0.095
982 2 8-10	2019-07-20 07:12 CEST	MAT253	70	2574	6.576	9.26	15.749	18.551	63.34	0.619	0.619	0.636968	0.636968	0.0386302	0.00693818	-0.051	0.136
	2019-07-22 18:38 CEST	MAT253	70	2575	6.549	9.177	15.613	18.183	27.961	0.591	0.591					-0.249	0.06
	2019-07-22 19:26 CEST	MAT253	70	2575	6.548	9.174	15.62	18.439	33.452	0.604	0.604					0.008	0.072
	2019-07-22 20:12 CEST	MAT253	70	2575	6.559	9.199	15.659	18.384	35.845	0.606	0.606					-0.094	0.082
	2019-07-24 01:06 CEST	MAT253	70	2576	6.541	9.205	15.65	18.476	41.066	0.61	0.61					-0.017	0.087
	2019-07-24 01:54 CEST	MAT253	70	2576	6.542	9.188	15.631	18.513	44.343	0.607	0.607					0.053	0.096
	2019-07-24 02:43 CEST	MAT253	70	2576	6.542	9.205	15.66	18.316	47.242	0.619	0.619					-0.174	0.102
	2019-07-25 18:58 CEST	MAT253	70	2577	6.564	9.198	15.66	18.398	42.335	0.602	0.602					-0.079	0.083
	2019-07-25 19:45 CEST	MAT253	70	2577	6.56	9.175	15.622	18.371	51.458	0.591	0.591					-0.059	0.1
	2019-08-08 00:30 CEST	MAT253	70	2585	6.562	9.206	15.68	18.4	-16.36	0.646	0.646					-0.068	0.088
	2019-08-12 17:09 CEST	MAT253	70	2587	6.55	9.221	15.719	18.326	42.657	0.688	0.688					-0.17	0.099
	2019-08-12 17:57 CEST	MAT253	70	2587	6.538	9.175	15.647	18.489	39.969	0.671	0.671					0.079	0.093
	2019-08-12 18:47 CEST	MAT253	70	2587	6.553	9.238	15.731	18.555	38.071	0.678	0.678					0.019	0.086
	2019-08-28 23:53 CEST	MAT253	70	2597	6.515	9.14	15.609	18.752	83.777	0.684	0.684					0.372	0.181
	2019-08-29 00:42 CEST	MAT253	70	2597	6.552	9.219	15.684	19.366	100.043	0.637	0.637					0.814	0.219
	2019-08-29 01:37 CEST	MAT253	70	2597	6.55	9.189	15.648	18.68	112.337	0.633	0.633					0.203	0.252
	2019-08-31 20:46 CEST	MAT253	70	2599	6.554	9.155	15.614	18.556	79.417	0.628	0.628					0.151	0.185
	2019-08-31 21:40 CEST	MAT253	70	2599	6.564	9.188	15.691	18.641	76.002	0.665	0.665					0.167	0.179
	2019-08-31 22:28 CEST	MAT253	70	2599	6.493	9.062	15.475	18.382	89.623	0.646	0.646					0.166	0.205
	2019-10-23 03:38 CEST	MAT253	70	2626	6.514	9.143	15.585	18.498	41.247	0.684	0.684					0.015	0.051
	2019-10-23 04:29 CEST	MAT253	70	2626	6.51	9.12	15.57	18.355	31.877	0.697	0.697					-0.079	0.039
	2019-10-23 05:24 CEST	MAT253	70	2626	6.573	9.221	15.693	18.336	17.583	0.65	0.65					-0.297	0.022
	2019-10-25 01:24 CEST	MAT253	70	2627	6.531	9.152	15.548	18.324	26.224	0.613	0.613					-0.172	0.036
	2019-10-25 02:11 CEST	MAT253	70	2627	6.523	9.141	15.574	18.421	27.335	0.665	0.665					-0.055	0.037
	2019-10-25 03:00 CEST	MAT253	70	2627	6.536	9.145	15.572	18.321	32.625	0.642	0.642					-0.161	0.045
	2019-10-26 09:19 CEST	MAT253	70	2628	6.551	9.181	15.605	18.141	22.442	0.622	0.622					-0.408	0.036
	2019-10-26 10:06 CEST	MAT253	70	2628	6.544	9.131	15.532	18.193	23.525	0.604	0.604					-0.257	0.038
	2019-10-26 10:56 CEST	MAT253	70	2628	6.555	9.19	15.558	18.338	16.638	0.555	0.555					-0.232	0.028
	2019-10-29 06:35 CET	MAT253	70	2629	6.548	9.177	15.595	18.618	52.065	0.618	0.618					0.065	0.073
	2019-10-29 07:25 CET	MAT253	70	2629	6.552	9.143	15.572	18.329	50.207	0.625	0.625					-0.149	0.07
982 3 3-5	2018-12-08 13:22 CET	253 Plus	70	307	8.544	9.322	17.846	19.993	36.595	0.614	0.614	0.632958	0.632958	0.0312376	0.00637636	-1.253	1.3
	2018-12-11 21:21 CET	253 Plus	70	309	8.561	9.39	17.935	17.882	13.941	0.588	0.588					-0.887	0.442
	2018-12-11 22:59 CET	253 Plus	70	309	8.571	9.412	18.019	18.099	20.754	0.636	0.636					-0.715	0.647
	2018-12-13 02:18 CET	253 Plus	70	310	8.569	9.422	18.033	17.733	15.372	0.643	0.643					-0.452	0.459
	2018-12-13 03:06 CET	253 Plus	70	310	8.578	9.412	18	18.061	17.708	0.614	0.614					-0.105	0.549
	2018-12-13 03:54 CET	253 Plus	70	310	8.565	9.386	17.997	17.845	18.461	0.647	0.647					-0.27	0.545
	2019-01-09 03:15 CET	253 Plus	70	316	8.632	9.553	18.215	18.018	25.546	0.676	0.676					-0.336	0.821
	2019-01-09 04:04 CET	253 Plus	70	316	8.6	9.494	18.047	17.935	22.592	0.6	0.6					-0.302	0.734
	2019-01-09 04:54 CET	253 Plus	70	316	8.591	9.492	18.08	17.786	31.339	0.644	0.644					-0.45	0.985
	2019-01-09 05:44 CET	253 Plus	70	316	8.624	9.553	18.187	17.852	34.492	0.656	0.656					-0.504	1.081
	2019-01-11 22:12 CET	MAT253	70	2472	8.521	9.347	17.779	18.472	-1.016	0.631	0.631					-0.195	-0.002
	2019-01-11 23:00 CET	MAT253	70	2472	8.52	9.26	17.696	18.544	1.83	0.636	0.636					0.046	0.003
	2019-01-11 23:48 CET	MAT253	70	2472	8.558	9.358	17.805	18.373	4.636	0.605	0.605					-0.313	0.007
	2019-01-12 00:35 CET	MAT253	70	2472	8.537	9.292	17.726	18.416	19.791	0.614	0.614					-0.142	0.032
	2019-10-24 22:54 CEST	MAT253	70	2627	8.508	9.264	17.771	18.542	20.003	0.673	0.673					-0.182	0.026
	2019-10-24 23:42 CEST	MAT253	70	2627	8.51	9.281	17.764	18.575	26.339	0.644	0.644					-0.182	0.036
	2019-10-25 00:34 CEST	MAT253	70	2627	8.509	9.247	17.705	18.552	46.057	0.617	0.617					-0.138	0.063
	2019-10-26 06:46 CEST	MAT253	70	2628	8.533	9.291	17.78	18.364	25.854	0.624	0.624					-0.407	0.04
	2019-10-26 07:35 CEST	MAT253	70	2628	8.53	9.32	17.798	18.721	25.868	0.617	0.617					-0.118	0.041
	2019-10-28 19:30 CET	MAT253	70	2629	8.521	9.273	17.802	18.618	47.491	0.681	0.681					-0.126	0.068
	2019-10-28 20:25 CET	MAT253	70	2629	8.537	9.339	17.829	18.719	40.395	0.621	0.621					-0.158	0.06
	2019-10-28 21:13 CET	MAT253	70	2629	8.522	9.277	17.782	18.775	51.791	0.654	0.654					0.019	0.077
982 3 5-8	2018-12-13 14:08 CET	253 Plus	70	310	6.901	8.287	15.139	15.882	22.667	0.609	0.609	0.649353	0.649353	0.0411667	0.0099844	0.203	0.628
	2019-01-09 19:10 CET	253 Plus	70	316	6.907	8.365	15.27	15.415	53.33	0.703	0.703					-0.615	1.75
	2019-01-09 20:00 CET	253 Plus	70	316	6.896	8.363	15.203	15.694	39.009	0.649	0.649					-0.328	1.289
	2019-01-09 22:31 CET	253 Plus	70	316	6.886	8.32	15.225	15.674	34.793	0.725	0.725					-0.262	1.152
	2019-01-09 23:19 CET	253 Plus	70	316	6.878	8.359	15.236	15.834	35.564	0.706	0.706					-0.178	1.206
	2019-01-12 15:15 CET	MAT253	70	2472	6.828	8.128	14.81	16.244	38.006	0.631	0.631					0.038	0.061
	2019-01-12 16:09 CET	MAT253	70	2472	6.851	8.191	14.868	16.204	46.211	0.599	0.599					-0.126	0.074
	2019-01-12 16:56 CET	MAT253	70	2472	6.834	8.126	14.774	16.232	32.413	0.585	0.585					0.03	0.052
	2019-01-12 17:44 CET	MAT253	70	2472	6.851	8.232	14.921	16.39	45.681	0.614	0.614					-0.025	0.072
	2019-02-01 01:10 CET	MAT253	70	2488	6.836	8.188	14.907	16.527	38.453	0.664	0.664					0.197	0.054
	2019-02-01 01:57 CET	MAT253	70	2488	6.834	8.154	14.884	16.266	47.131	0.678	0.678					0.008	0.067
	2019-02-04 22:14 CET	MAT253	70	2489	6.831	8.168	14.872	16.451	34.62	0.653	0.653					0.162	0.055
	2019-02-04 23:01 CET	MAT253	70	2489	6.838	8.144	14.87	16.154	30.489	0.668	0.668					-0.082	0.047
	2019-02-12 03:09 CET	MAT253	70	2493	6.831	8.174	14.893	16.338	30.327	0.657	0.657					0	0.046
	2019-02-12 03:56 CET	MAT253	70	2493	6.831	8.144	14.844	16.252	45.561	0.636	0.636					-0.025	0.067
	2019-05-09 17:07 CEST	MAT253	70	2533	6.838	8.261	14.973	16.731	19.341	0.68	0.68					0.211	0.038
	2019-05-09 17:55 CEST	MAT253	70	2533	6.822	8.19	14.797	16.175	0.508	0.582	0.582					-0.192	0.001
982 3 8-10	2018-12-13 13:20 CET	253 Plus	70	310	6.755	8.598	15.296	16.744	33.649	0.61	0.61	0.66276	0.66276	0.0345465	0.00690931	0.452	1.033
	2019-01-12 12:03 CET	MAT253	70	2472	6.7	8.394	14.976	16.688	44.84	0.67	0.67					-0.054	0.072
	2019-01-12 12:51 CET	MAT253	70	2472	6.736	8.512	15.132	16.862	59.281	0.673	0.673					-0.118	0.095
	2019-01-12 13:39 CET	MAT253	70	2472	6.695	8.432	15.022	16.862	40.505	0.686	0.686					0.041	0.064
	2019-01-12 14:27 CET	MAT253	70	2472	6.709	8.487	15.111	16.893	64.1	0.709	0.709					-0.037	0.098
	2019-02-01 02:44 CET	MAT253	70	2488	6.687	8.468	15.022	16.773	42.665	0.655	0.655					-0.118	0.061
	2019-02-01 03:30 CET	MAT253	70	2488	6.71	8.461	15.071	16.896	34.061	0.691	0.691					0.017	0.049
	2019-02-04 23:55 CET	MAT253	70	2489	6.706	8.466	15.041	16.89	20.505	0.658	0.658					0.001	0.032
	2019-02-12 04:43 CET	MAT253	70	2493	6.709	8.466	15.043	17.057	32.779	0.645	0.645					0.126	0.05
	2019-02-12 05:30 CET	MAT253	70	2493	6.706	8.417	14.96	16.901	24.727	0.61	0.61					0.071	0.038
	2019-05-09 14:37 CEST	MAT253	70	2533	6.681	8.497	15.06	17.442	-16.185	0.7	0.7					0.441	-0.029
	2019-05-09 15:24 CEST	MAT253	70	2533	6.708	8.547	15.093	17.151	6.031	0.65	0.65					0.057	0.01
	2019-05-09 16:11 CEST	MAT253	70	2533	6.705	8.51	15.021	16.99	-1.747	0.614	0.614					-0.027	-0.002
	2019-05-15 08:46 CEST	MAT253	70	2535	6.685	8.484	14.974	16.401	-15.553	0.63	0.63					-0.584	-0.028
	2019-05-15 09:33 CEST	MAT253	70	2535	6.726	8.568	15.166	17.365	12.362	0.705	0.705					0.191	0.023
	2019-05-15 10:20 CEST	MAT253	70	2535	6.694	8.51	15.075	17.257	30.724	0.705	0.705					0.2	0.055
	2019-10-24 20:25 CEST	MAT253	70	2627	6.689	8.473	15.078	16.989	31.779	0.656	0.656					-0.124	0.042
	2019-10-24 21:15 CEST	MAT253	70	2627	6.678	8.432	15.022	16.959	26.572	0.65	0.65					-0.073	0.035
	2019-10-24 22:03 CEST	MAT253	70	2627	6.684	8.474	15.068	17.074	27.936	0.649	0.649					-0.045	0.037
	2019-10-26 04:15 CEST	MAT253	70	2628	6.692	8.474	15.049	16.833	24.714	0.618	0.618					-0.279	0.04
	2019-10-26 05:07 CEST	MAT253	70	2628	6.687	8.45	15.067	16.93	38.979	0.671	0.671					-0.137	0.061
	2019-10-26 05:58 CEST	MAT253	70	2628	6.714	8.499	15.125	17.214	21.535	0.649	0.649					0.043	0.034
	2019-10-28 17:01 CET	MAT253	70	2629	6.696	8.495	15.098	17.054	32.918	0.645	0.645					-0.105	0.054
	2019-10-28 18:43 CET	MAT253	70	2629	6.686	8.473	15.083	16.999	26.498	0.664	0.664					-0.116	0.039
982 9 3-5	2019-07-17 05:03 CEST	MAT253	70	2573	10.092	8.291	18.33	16.657	33.892	0.654	0.654	0.618	0.618	0.030983	0.00516383	0.147	0.063
	2019-07-23 07:42 CEST	MAT253	70	2575	10.114	8.319	18.446	16.666	51.633	0.56	0.56					-0.032	0.117
	2019-07-23 08:31 CEST	MAT253	70	2575	10.141	8.295	18.469	16.475	55.386	0.581	0.581					-0.169	0.125
	2019-07-23 09:19 CEST	MAT253	70	2575	10.154	8.378	18.571	16.789	54.883	0.588	0.588					-0.027	0.124
	2019-07-24 14:38 CEST	MAT253	70	2576	10.086	8.299	18.501	16.565	40.907	0.673	0.673					-0.089	0.087
	2019-07-24 15:25 CEST	MAT253	70	2576	10.126	8.315	18.515	16.609	76.182	0.625	0.625					-0.079	0.155
	2019-07-24 16:15 CEST	MAT253	70	2576	10.118	8.331	18.547	16.706	53.548	0.653	0.653					-0.015	0.107
	2019-07-26 08:03 CEST	MAT253	70	2577	10.139	8.312	18.491	16.484	55.373	0.588	0.588					-0.194	0.117
	2019-07-26 08:51 CEST	MAT253	70	2577	10.142	8.278	18.445	16.708	55.543	0.572	0.572					0.093	0.12
	2019-07-26 09:38 CEST	MAT253	70	2577	10.135	8.303	18.476	16.915	64.072	0.585	0.585					0.245	0.137
	2019-08-08 15:15 CEST	MAT253	70	2585	10.091	8.253	18.395	16.453	-11.963	0.632	0.632					-0.083	0.065
	2019-08-08 16:04 CEST	MAT253	70	2585	10.069	8.268	18.427	16.667	-25.537	0.677	0.677					0.096	0.135
	2019-08-08 16:50 CEST	MAT253	70	2585	10.109	8.27	18.462	16.669	-28.048	0.667	0.667					0.094	0.154
	2019-08-12 19:43 CEST	MAT253	70	2587	10.149	8.345	18.563	16.863	44.891	0.649	0.649					0.135	0.101
	2019-08-12 20:35 CEST	MAT253	70	2587	10.142	8.353	18.527	16.832	51.826	0.608	0.608					0.088	0.119
	2019-08-12 21:26 CEST	MAT253	70	2587	10.108	8.292	18.447	16.454	58.488	0.627	0.627					-0.16	0.132
	2019-08-24 16:46 CEST	MAT253	70	2595	10.115	8.297	18.418	16.594	76.447	0.57	0.57					-0.067	0.124
	2019-08-24 17:36 CEST	MAT253	70	2595	10.151	8.352	18.527	16.916	88.072	0.588	0.588					0.139	0.144
	2019-08-24 18:29 CEST	MAT253	70	2595	10.117	8.281	18.442	16.826	93.752	0.612	0.612					0.192	0.151
	2019-08-30 11:02 CEST	MAT253	70	2598	10.106	8.27	18.422	16.623	63.921	0.614	0.614					0.015	0.141
	2019-08-30 11:54 CEST	MAT253	70	2598	10.109	8.282	18.45	16.72	60.861	0.629	0.629					0.087	0.143
	2019-08-30 12:41 CEST	MAT253	70	2598	10.15	8.295	18.477	16.954	72.841	0.596	0.596					0.289	0.188
	2019-08-31 18:22 CEST	MAT253	70	2599	10.111	8.313	18.47	16.736	67.404	0.615	0.615					0.04	0.166
	2019-08-31 19:10 CEST	MAT253	70	2599	10.105	8.279	18.455	16.785	70.026	0.643	0.643					0.157	0.176
	2019-08-31 19:59 CEST	MAT253	70	2599	10.128	8.289	18.468	17	84.008	0.619	0.619					0.346	0.206
	2019-10-23 06:11 CEST	MAT253	70	2626	10.11	8.297	18.471	16.899	48.03	0.664	0.664					0.136	0.059
	2019-10-23 07:06 CEST	MAT253	70	2626	10.144	8.357	18.517	16.749	31.473	0.61	0.61					-0.129	0.04
	2019-10-23 07:54 CEST	MAT253	70	2626	10.086	8.206	18.334	16.485	11.004	0.642	0.642					-0.086	0.015
	2019-10-25 03:51 CEST	MAT253	70	2627	10.062	8.253	18.373	16.701	41.169	0.659	0.659					0.031	0.056
	2019-10-25 04:43 CEST	MAT253	70	2627	10.102	8.261	18.4	16.802	42.445	0.634	0.634					0.114	0.058
	2019-10-25 05:33 CEST	MAT253	70	2627	10.114	8.242	18.363	16.671	40.004	0.6	0.6					0.022	0.054
	2019-10-26 11:46 CEST	MAT253	70	2628	10.115	8.279	18.376	16.419	24.257	0.573	0.573					-0.295	0.043
	2019-10-26 12:35 CEST	MAT253	70	2628	10.117	8.316	18.451	16.554	22.157	0.613	0.613					-0.237	0.043
	2019-10-26 13:28 CEST	MAT253	70	2628	10.134	8.264	18.411	16.768	51.907	0.606	0.606					0.074	0.094
	2019-10-29 08:39 CET	MAT253	70	2629	10.139	8.279	18.427	16.417	61.022	0.601	0.601					-0.299	0.097
	2019-10-29 09:53 CET	MAT253	70	2629	10.119	8.28	18.424	16.566	67.362	0.621	0.621					-0.154	0.113
982 9 5-8	2019-07-20 08:00 CEST	MAT253	70	2574	8.849	7.879	16.708	15.628	52.23	0.577	0.577	0.61695	0.61695	0.0349614	0.00552788	-0.174	0.104
	2019-07-20 08:53 CEST	MAT253	70	2574	8.795	7.818	16.575	15.914	108.069	0.559	0.559					0.229	0.217
	2019-07-20 09:44 CEST	MAT253	70	2574	8.833	7.896	16.722	15.641	60.229	0.593	0.593					-0.195	0.122
	2019-07-22 21:05 CEST	MAT253	70	2575	8.882	7.851	16.712	15.276	22.014	0.574	0.574					-0.463	0.046
	2019-07-22 21:54 CEST	MAT253	70	2575	8.866	7.887	16.765	15.638	46.234	0.611	0.611					-0.18	0.098
	2019-07-22 22:42 CEST	MAT253	70	2575	8.86	7.836	16.698	15.684	42.309	0.6	0.6					-0.034	0.091
	2019-07-24 03:36 CEST	MAT253	70	2576	8.832	7.846	16.655	15.687	62.18	0.573	0.573					-0.051	0.121
	2019-07-24 04:26 CEST	MAT253	70	2576	8.87	7.877	16.73	15.648	47.843	0.579	0.579					-0.149	0.094
	2019-07-24 05:16 CEST	MAT253	70	2576	8.871	7.838	16.703	15.234	27.302	0.591	0.591					-0.477	0.053
	2019-08-08 10:21 CEST	MAT253	70	2585	8.836	7.808	16.659	15.643	-17.894	0.645	0.645					0.004	0.097
	2019-08-08 11:09 CEST	MAT253	70	2585	8.852	7.888	16.735	15.765	-8.737	0.621	0.621					-0.034	0.047
	2019-08-08 11:58 CEST	MAT253	70	2585	8.857	7.878	16.719	15.596	-14.261	0.609	0.609					-0.179	0.078
	2019-08-12 22:16 CEST	MAT253	70	2587	8.838	7.872	16.7	15.602	42.272	0.617	0.617					-0.162	0.086
	2019-08-12 23:07 CEST	MAT253	70	2587	8.837	7.866	16.683	15.564	51.374	0.604	0.604					-0.189	0.105
	2019-08-12 23:56 CEST	MAT253	70	2587	8.83	7.874	16.642	15.526	57.212	0.557	0.557					-0.242	0.117
	2019-08-28 21:19 CEST	MAT253	70	2597	8.859	7.901	16.762	16.114	99.967	0.619	0.619					0.249	0.194
	2019-08-28 22:11 CEST	MAT253	70	2597	8.861	7.873	16.734	16.121	101.834	0.616	0.616					0.31	0.197
	2019-08-30 13:29 CEST	MAT253	70	2598	8.838	7.869	16.727	16.16	67.874	0.639	0.639					0.357	0.161
	2019-08-30 14:16 CEST	MAT253	70	2598	8.833	7.812	16.699	15.832	63.363	0.675	0.675					0.149	0.148
	2019-08-30 15:04 CEST	MAT253	70	2598	8.86	7.838	16.695	15.813	51.823	0.613	0.613					0.079	0.122
	2019-08-31 15:52 CEST	MAT253	70	2599	7.242	9.148	16.296	18.553	73.819	0.597	0.597					0.16	0.176
	2019-08-31 16:45 CEST	MAT253	70	2599	7.215	9.089	16.219	18.408	70.254	0.607	0.607					0.136	0.166
	2019-08-31 17:33 CEST	MAT253	70	2599	7.231	9.096	16.266	18.283	64.678	0.634	0.634					0.001	0.162
	2019-10-23 08:48 CEST	MAT253	70	2626	8.836	7.791	16.595	15.585	19.971	0.609	0.609					-0.141	0.028
	2019-10-23 09:38 CEST	MAT253	70	2626	8.837	7.793	16.589	15.64	46.839	0.6	0.6					-0.091	0.069
	2019-10-25 09:42 CEST	MAT253	70	2627	8.793	7.754	16.509	15.577	46.607	0.604	0.604					-0.075	0.074
	2019-10-25 10:30 CEST	MAT253	70	2627	8.844	7.784	16.631	15.79	58.429	0.649	0.649					0.074	0.09
	2019-10-25 11:21 CEST	MAT253	70	2627	8.837	7.8	16.582	15.268	25.867	0.584	0.584					-0.468	0.042
	2019-10-26 17:37 CEST	MAT253	70	2628	8.843	7.804	16.578	15.544	22.702	0.568	0.568					-0.207	0.037
	2019-10-26 18:24 CEST	MAT253	70	2628	8.856	7.806	16.644	15.589	44.061	0.625	0.625					-0.166	0.074
	2019-10-29 11:07 CET	MAT253	70	2629	8.858	7.822	16.672	15.727	73.632	0.636	0.636					-0.064	0.117
	2019-11-21 16:24 CET	MAT253	70	2644	8.851	7.786	16.641	15.518	26.33	0.648	0.648					-0.197	0.047
	2019-11-21 17:15 CET	MAT253	70	2644	8.851	7.822	16.665	15.998	39.774	0.636	0.636					0.202	0.073
	2019-11-21 18:02 CET	MAT253	70	2644	8.86	7.791	16.641	15.856	50.605	0.634	0.634					0.125	0.087
	2019-11-25 11:58 CET	MAT253	70	2646	8.856	7.88	16.709	16.012	38.841	0.615	0.615					0.1	0.085
	2019-11-25 12:45 CET	MAT253	70	2646	8.851	7.851	16.685	15.68	41.397	0.627	0.627					-0.166	0.089
	2019-11-25 13:38 CET	MAT253	70	2646	8.73	7.846	16.565	15.663	29.779	0.639	0.639					-0.173	0.064
982 9 8-10	2019-06-29 02:11 CEST	MAT253	70	2565	8.497	7.853	16.196	15.409	12.186	0.607	0.607	0.65712	0.65712	0.0460316	0.00920631	-0.304	0.02
	2019-07-01 21:33 CEST	MAT253	70	2566	8.301	7.507	15.738	15.259	45.59	0.704	0.704					0.237	0.112
	2019-07-01 22:23 CEST	MAT253	70	2566	8.49	7.873	16.268	15.809	22.207	0.671	0.671					0.048	0.054
	2019-07-02 21:12 CEST	MAT253	70	2567	8.519	7.982	16.419	15.902	13.585	0.687	0.687					-0.074	0.029
	2019-07-02 23:02 CEST	MAT253	70	2567	8.492	7.856	16.225	15.806	20.102	0.641	0.641					0.08	0.043
	2019-07-04 22:09 CEST	MAT253	70	2568	8.524	7.872	16.27	15.982	30.894	0.618	0.618					0.178	0.058
	2019-07-04 23:06 CEST	MAT253	70	2568	8.507	7.85	16.271	15.967	34.566	0.66	0.66					0.206	0.067
	2019-07-04 23:55 CEST	MAT253	70	2568	8.486	7.845	16.265	15.716	31.024	0.682	0.682					-0.029	0.059
	2019-07-06 06:09 CEST	MAT253	70	2569	8.514	7.877	16.3	15.817	41.322	0.655	0.655					0.008	0.084
	2019-07-06 06:57 CEST	MAT253	70	2569	8.512	7.818	16.212	15.651	39.708	0.626	0.626					-0.039	0.083
	2019-07-06 07:47 CEST	MAT253	70	2569	8.519	7.808	16.186	15.612	40.112	0.602	0.602					-0.057	0.095
	2019-07-17 08:33 CEST	MAT253	70	2573	6.801	3.892	10.547	7.977	9.724	0.647	0.647					0.339	0.02
	2019-07-17 09:23 CEST	MAT253	70	2573	8.665	8.224	16.742	16.49	40.085	0.615	0.615					0.116	0.078
	2019-07-17 10:10 CEST	MAT253	70	2573	8.515	7.91	16.275	15.936	16.701	0.615	0.615					0.196	0.031
	2019-07-20 02:09 CEST	MAT253	70	2574	8.497	7.859	16.379	15.763	77.918	0.639	0.639					-0.001	0.164
	2019-07-20 02:57 CEST	MAT253	70	2574	8.489	7.872	16.448	15.963	71.499	0.709	0.709					0.168	0.158
	2019-07-20 03:51 CEST	MAT253	70	2574	8.515	7.865	16.402	15.856	73.502	0.639	0.639					0.078	0.165
	2019-10-23 22:17 CEST	MAT253	70	2626	8.501	7.916	16.366	15.922	75.235	0.605	0.605					-0.059	0.105
	2019-10-23 23:04 CEST	MAT253	70	2626	8.495	7.835	16.32	15.743	62.42	0.65	0.65					-0.074	0.086
	2019-10-23 23:54 CEST	MAT253	70	2626	8.489	7.902	16.381	15.993	81.505	0.651	0.651					0.038	0.112
	2019-10-28 22:06 CET	MAT253	70	2629	8.515	7.891	16.425	16.083	52.956	0.682	0.682					0.146	0.082
	2019-10-28 22:54 CET	MAT253	70	2629	8.515	7.889	16.383	15.958	62.142	0.637	0.637					0.028	0.093
	2019-10-28 23:47 CET	MAT253	70	2629	8.497	7.85	16.324	15.744	56.606	0.635	0.635					-0.103	0.082

## Sheet: Summary clumped & Alk. temps
Site/Size fraction	SST (Prod. Season)	Age (My)	∆47	n		∆47 CT (°C) (Clark et al., 2024)	± CI (95%)	∆47 CT (°C) (Meinicke et al., 2021)	± CI (95%)	UK'37 SST (°C) (Tierney and Tingley, 2018)	UK'37 SST (°C) (Müller et al., 1998)	UK'37 SST (°C) (Prahl et al., 1988)	UK'37 T (°C) (Mejía et al., 2023)
ST Iceland	6.74		0.659095	21		7.41119	4.42754	7.03632	4.16102
982 (2-10)	9.6	1.99226	0.652059	17	0.598425	9.32387	4.04166	8.84475	3.79645	16.099	16.8007	16.4537	11.7475
		4.1686	0.632222	9	0.737651	15.2163	3.04529	14.3867	2.85356	20.2734	21.0197	20.5486	14.5658
		5.78574	0.653938	16	0.724712	8.80015	4.41103	8.35046	4.14561	19.8847	20.6276	20.168	14.3039
		6.70612	0.642	13	0.840956	12.2064	3.19744	11.5616	2.99843	23.5545	24.1502	23.5869	16.657
		7.61483	0.622722	18	0.902621	18.5483	4.0013	17.4891	3.73727	26.0814	26.0188	25.4006	17.9053
		10.0661	0.6262	20	0.934155	17.505	4.23379	16.5088	3.96201	27.7104	26.9744	26.3281	18.5436
		11.7787	0.629895	19	0.914474	16.3537	4.57202	15.4294	4.28235	26.6835	26.378	25.7492	18.1452
		13.9922	0.623417	11	0.89082	18.304	5.00889	17.2616	4.67655	25.5126	25.6612	25.0535	17.6664
		15.9958	0.628375	16	0.968736	16.6644	4.06067	15.7295	3.79271	29.6442	28.0223	27.3452	19.2436
982 (<11)	9.6	1.99226	0.651364	11	0.598425	9.39088	3.96406	8.91563	3.72438	16.099	16.8007	16.4537	11.7475
		4.1686	0.639364	11	0.737651	12.9165	1.7982	12.2338	1.68513	20.2734	21.0197	20.5486	14.5658
		5.78574	0.643481	20	0.724712	12.1147	4.60936	11.4553	4.32506	19.8847	20.6276	20.168	14.3039
		6.70612	0.643692	13	0.840956	11.8451	4.62728	11.2136	4.34069	23.5545	24.1502	23.5869	16.657
		7.61483	0.623687	16	0.902621	18.2885	4.70285	17.2423	4.38531	26.0814	26.0188	25.4006	17.9053
		10.0661	0.6236	20	0.934155	18.3016	3.99689	17.2561	3.73391	27.7104	26.9744	26.3281	18.5436
		11.7787	0.640882	17	0.914474	12.6134	3.2312	11.9401	3.03028	26.6835	26.378	25.7492	18.1452
		13.9922	0.630353	17	0.89082	16.0617	4.11537	15.1637	3.84875	25.5126	25.6612	25.0535	17.6664
		15.9958	0.625053	19	0.968736	17.9339	4.66736	16.9062	4.36179	29.6442	28.0223	27.3452	19.2436
